# Supplementary material for: Synthesis, characterization, theoretical studies and catecholase like activities of [MO6] type complexes
Source: Royal Society of Chemistry journal article supplement (doi:10.1039/c9nj03729b), 2019-01-01
Supplement: c9nj03729b1.pdf [file c9nj03729b1.pdf]

Electronic Supplementary Information (ESI)

**Synthesis, characterization, theoretical studies and catecholase like activities of  $[MO_6]$  type complexes**

M. Naqi Ahamad,<sup>a</sup> Manjeet Kumar<sup>b</sup>, Azaj Ansari<sup>b</sup>, Mantasha I.<sup>a</sup>, Musheer Ahmad<sup>c</sup>, M. Shahid<sup>a\*</sup>

---

<sup>a</sup> Department of Chemistry, Aligarh Muslim University, Aligarh-202002, India

<sup>b</sup> Department of Chemistry, Central University of Haryana, Mahendergarh-123031, Haryana, India

<sup>c</sup> Department of Applied Chemistry (ZHCET), Aligarh Muslim University, Aligarh-202002, India

Table S1. Selected bond lengths (Å) and angles (°) for the complexes

| 1    |      |            |      |      |      |            |
|------|------|------------|------|------|------|------------|
| Atom | Atom | Length     | Atom | Atom | Atom | Angle      |
| O1   | C1   | 1.312(3)   | Co1  | O1   | C1   | 117.34(13) |
| O1   | Co1  | 2.0008(14) | Co1  | O2   | C7   | 110.40(12) |
| O2   | C7   | 1.382(2)   | Co1  | O2   | C8   | 129.88(13) |
| O2   | C8   | 1.432(3)   | O1   | Co1  | O1   | 157.56(8)  |
| O2   | Co1  | 2.2475(14) | O2   | Co1  | O1   | 89.27(6)   |
| O3   | C5   | 1.228(3)   | O2   | Co1  | O1   | 75.33(5)   |
| Co1  | O4   | 2.0434(15) | O2   | Co1  | O2   | 93.71(8)   |
| C2   | C1   | 1.406(3)   | O4   | Co1  | O1   | 98.14(6)   |
| C3   | C4   | 1.399(3)   | O4   | Co1  | O1   | 97.52(6)   |
| C1   | C7   | 1.421(3)   | O4   | Co1  | O2   | 88.05(6)   |
| C7   | C6   | 1.371(3)   | O4   | Co1  | O2   | 172.59(6)  |
| C5   | C4   | 1.447(3)   | O4   | Co1  | O4   | 91.12(9)   |
| 2    |      |            |      |      |      |            |
| Zn1  | O1   | 1.9836(14) | O1   | Zn1  | O1   | 156.15(8)  |
| Zn1  | O4   | 2.0217(16) | O1   | Zn1  | O4   | 99.53(6)   |
| Zn1  | O2   | 2.3069(14) | O1   | Zn1  | O4   | 96.87(6)   |
| O1   | C1   | 1.312(2)   | O4   | Zn1  | O4   | 92.78(10)  |
| O2   | C6   | 1.379(2)   | O1   | Zn1  | O2   | 88.77(5)   |
| O2   | C7   | 1.431(2)   | O4   | Zn1  | O2   | 171.36(6)  |
| O3   | C8   | 1.229(3)   | O1   | Zn1  | O2   | 74.49(5)   |
| C1   | C2   | 1.402      | C1   | O1   | Zn1  | 118.85(12) |
| C1   | C6   | 1.421(3)   | C6   | O2   | Zn1  | 109.34(11) |
| C2   | C3   | 1.376(3)   | C7   | O2   | Zn1  | 130.61(12) |
| C3   | C4   | 1.392(3)   | Zn1  | O4   | H4A  | 119(2)     |
| C4   | C5   | 1.406(3)   | Zn1  | O4   | H4A  | 125(2)     |
| C5   | C6   | 1.373(3)   | C6   | O2   | C7   | 117.71(16) |

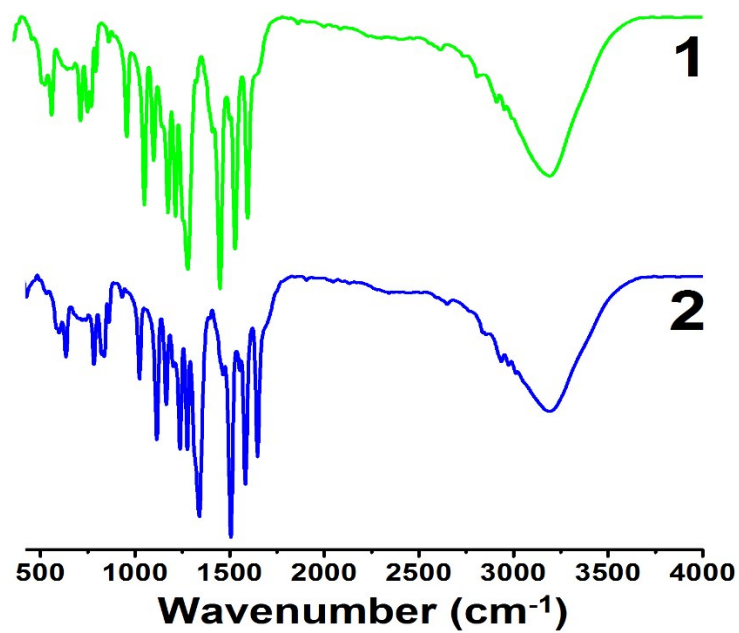

Fig. S1. FTIR spectra of 1 and 2.

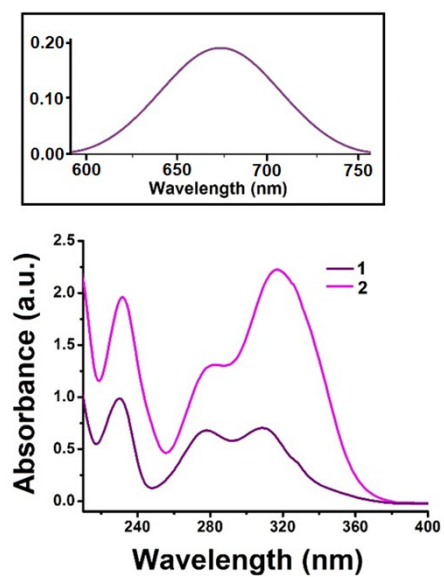

Fig. S2. Electronic spectra of 1 and 2.

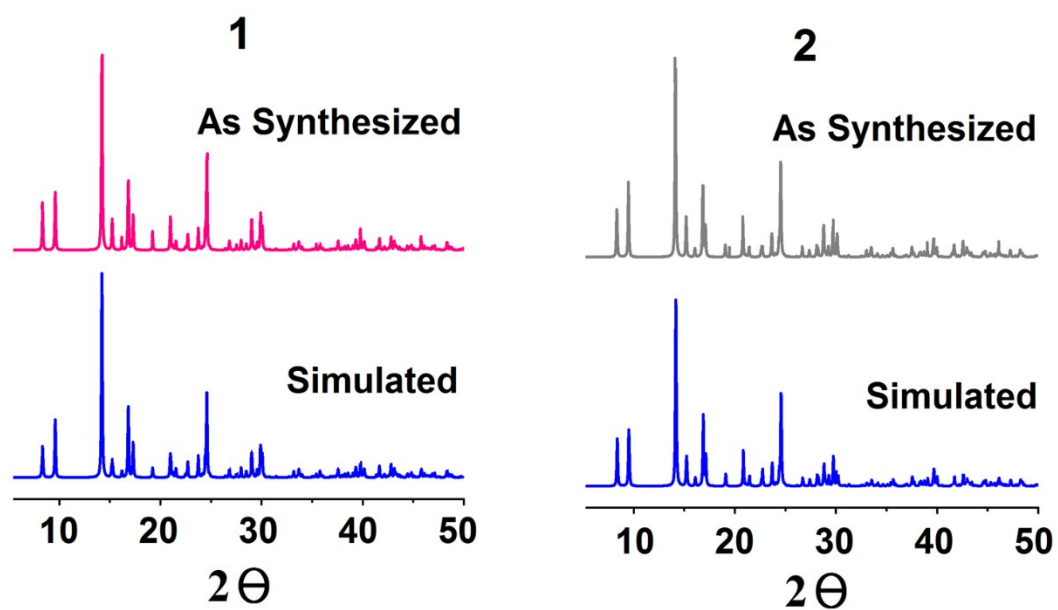

Fig. S3. As-synthesized and simulated PXRD patterns of **1** and **2**.

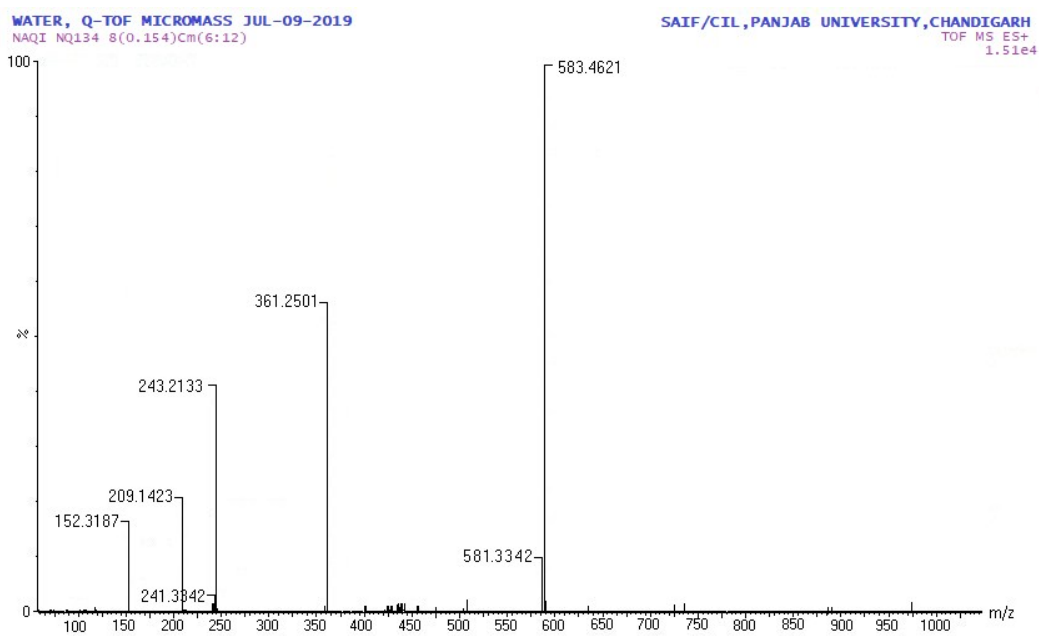

Fig. S4. ESI-MS spectrum (positive mode) of a mixture of **1** and 3,5DTBC recorded in ethanol.

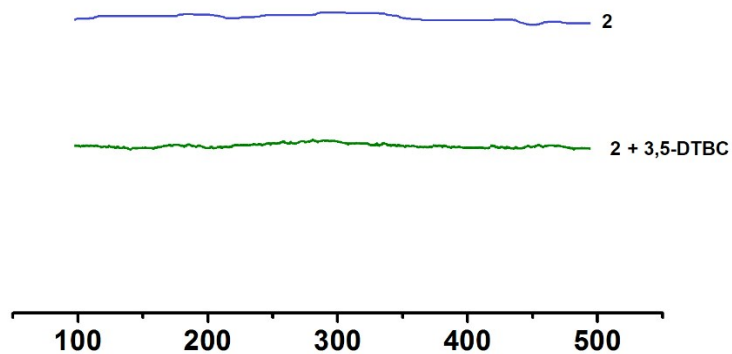

Fig. S5. EPR spectra of **2** before and after addition of 3,5-DTBC.

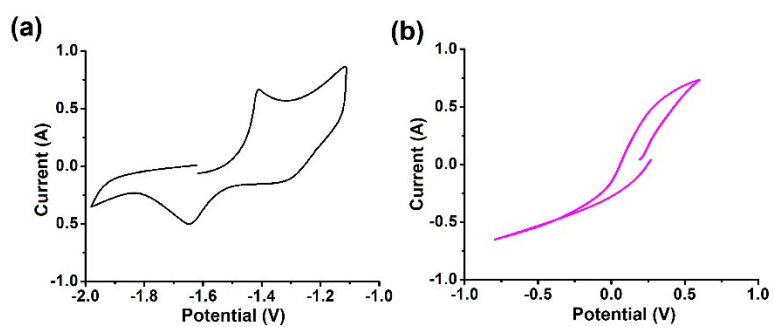

Fig. S6. Cyclic voltammograms of **1** (a) and **2** (b).

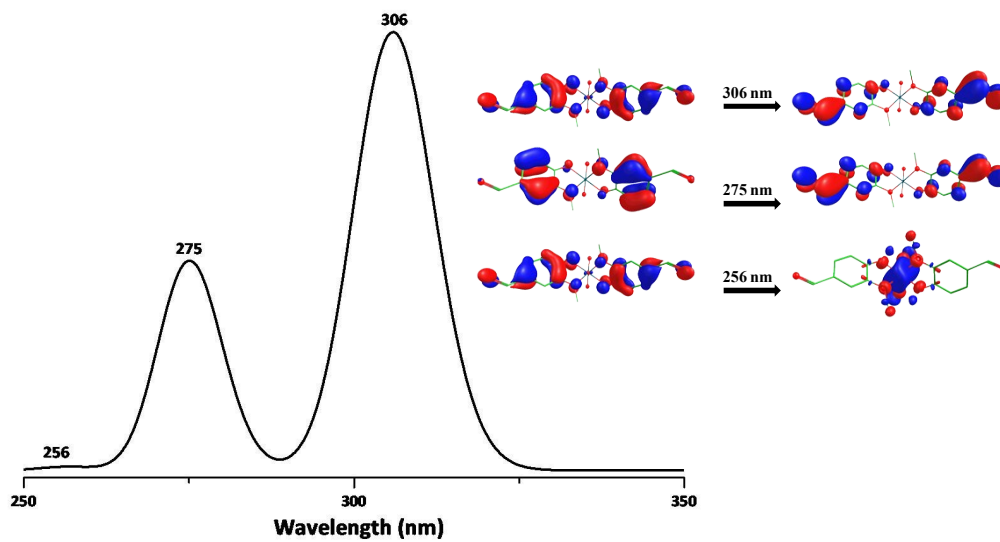

Fig S7. B3LYP TDDFT simulated electronic absorption spectra of the **2** and its corresponding orbitals involved in the transitions.
